# Supplementary material
Source: PubMed Central journal article supplement (PMC5660678)
Supplement: NIHMS362583-supplement-1.pdf [file NIHMS362583-supplement-1.pdf]

## Supplementary Information

# ATP binding controls distinct structural transitions of *Escherichia coli* DNA gyrase in complex with DNA

Aakash Basu, Allyn J. Schoeffler, James M. Berger, and Zev Bryant

## Table of Contents

|                                                                                                |          |
|------------------------------------------------------------------------------------------------|----------|
| <b>Supplementary Figure 1</b>                                                                  |          |
| <i>Possible geometries of <math>\alpha</math> and <math>\Omega</math> states under tension</i> | <b>2</b> |
| <b>Supplementary Figure 2</b>                                                                  |          |
| <i>Force dependent kinetics of the <math>\Omega</math> to <math>\alpha</math> transition</i>   | <b>3</b> |
| <b>Supplementary Figure 3</b>                                                                  |          |
| <i>Correspondence between rotor angle and mechanochemical states</i>                           | <b>4</b> |
| <b>Supplementary Figure 4</b>                                                                  |          |
| <i>Expanded mechanochemical model</i>                                                          | <b>5</b> |
| <b>Supplementary Notes</b>                                                                     |          |
| <i>Kinetic modeling</i>                                                                        | <b>6</b> |
| <b>References</b>                                                                              | <b>7</b> |

## SUPPLEMENTARY FIGURES

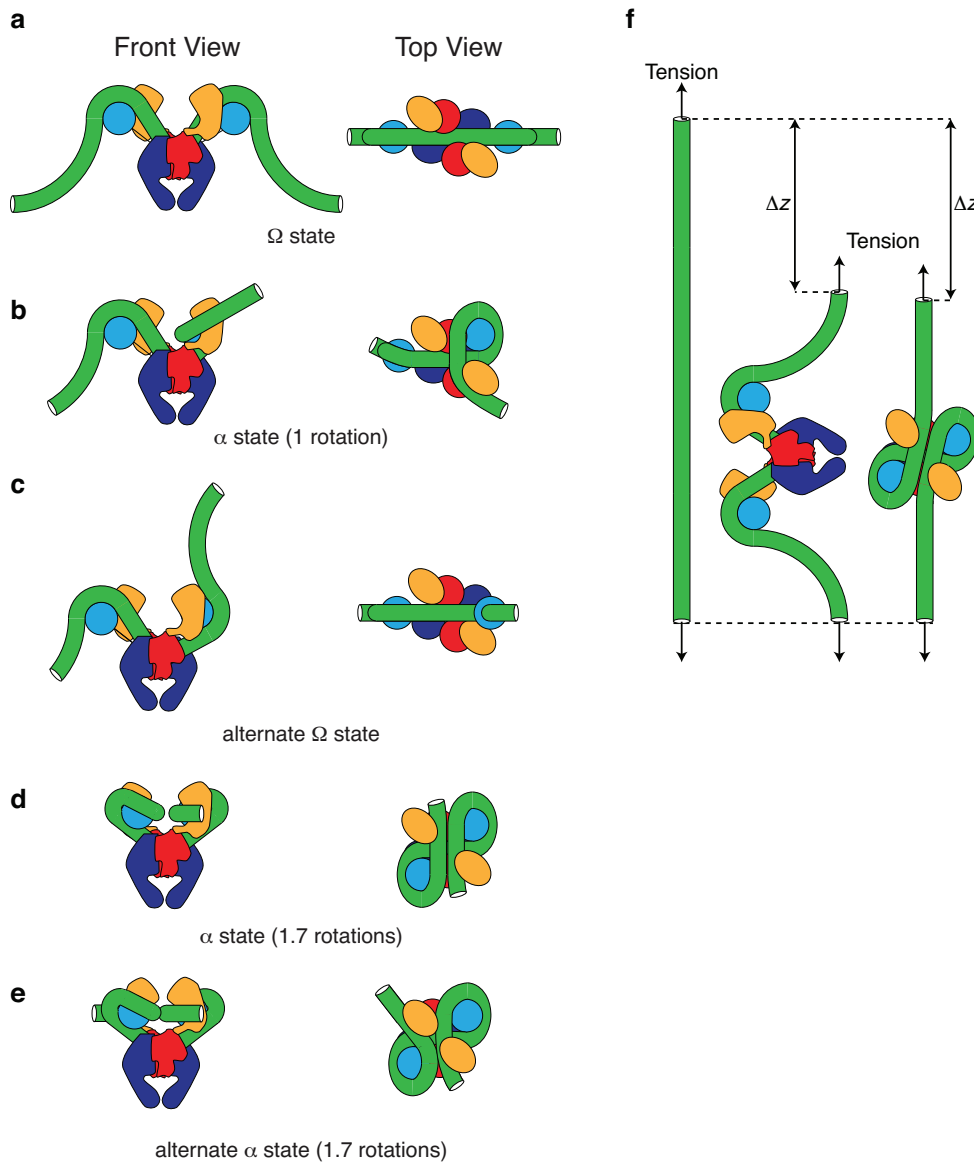

**Supplementary Figure 1** Possible geometries of  $\alpha$  and  $\Omega$  states under tension. Speculative illustrations are shown for the  $\Omega$  state and for  $\alpha$  state variants that trap  $\sim 1$  supercoil or  $\sim 1.7$  supercoils. Other configurations are possible; for example, since we do not directly observe the placement of CTDs, we cannot rule out alternative arrangements in which the CTDs are near the exit gate<sup>1</sup> in one or both of the  $\Omega$  and  $\alpha$  states. Moreover, states may be flexible; for example, states such as (a) and (c) may coexist with other configurations in the  $\Omega$  state to yield writhe that is zero on average. In the  $\sim 1.7$  rotation variant of the  $\alpha$  state, two potential T-segments may be simultaneously docked (d) as proposed earlier<sup>2</sup>

for yeast topoisomerase II, or (e) one of the potential T-segments may be excluded from the cavity. The  $\sim 1$  rotation and  $\sim 1.7$  rotation variants of the  $\alpha$  state are structurally distinct but functionally and kinetically indistinguishable in our assays. Panel (f) illustrates the conversion of free DNA to the  $\Omega$  state (shown in front view) with a large contraction in  $z$ , followed by conversion from  $\Omega$  to  $\alpha$  without any large change in  $z$ . In this speculative diagram, the angle between DNA segments exiting the complex in  $\Omega$  compensates for exit points that are closer to each other in  $\alpha$ .

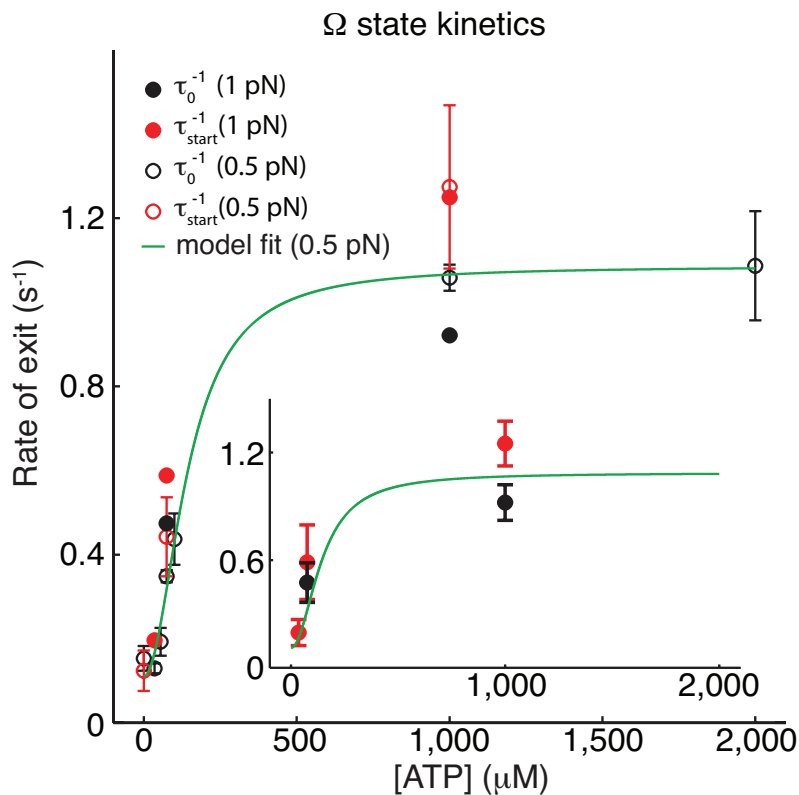

**Supplementary Figure 2** Force dependent kinetics of the  $\Omega$  to  $\alpha$  transition. Rates of exit are shown as a function of [ATP] for data taken at 0.5 pN (reproduced from **Fig. 6**) and at 1 pN. Two different measures of  $\Omega$  state lifetime are plotted: the duration of the dominant pause ( $\tau_0$ ) and also the lag time ( $\tau_{\text{start}}$ ) between contraction and rotation at the beginning of a processive burst. Standard errors are shown for 0.5 pN data in the main panel, and for 1 pN data in the inset. We conclude that the rate of the  $\Omega$  to  $\alpha$  transition is not substantially affected by tension in this range.

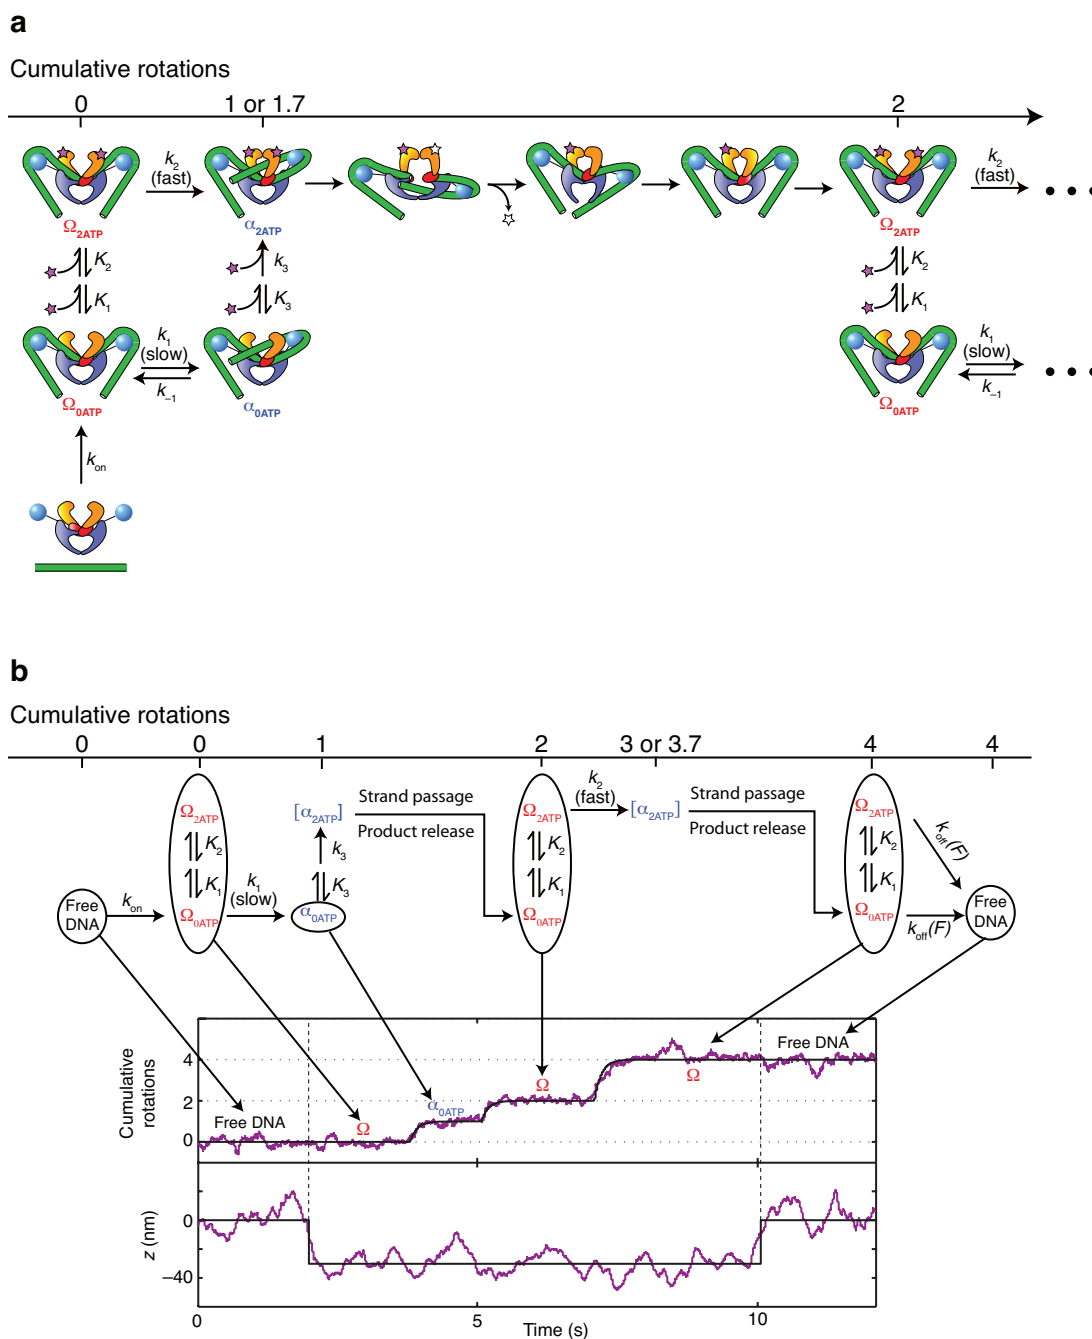

**Supplementary Figure 3** Correspondence between angular position of the rotor and states in the mechanochemical cycle. **(a)** The branched kinetic model (**Fig. 7**) is redrawn with states arranged in columns corresponding to rotational positions, and annotated to show the number of rotations of the reporter bead associated with each column. **(b)** A sample rotor bead trace has been annotated to indicate the likely sequence of states visited during this particular burst. Square brackets are used to denote states that are too short-lived to be detected as dwells in the rotor bead trace.

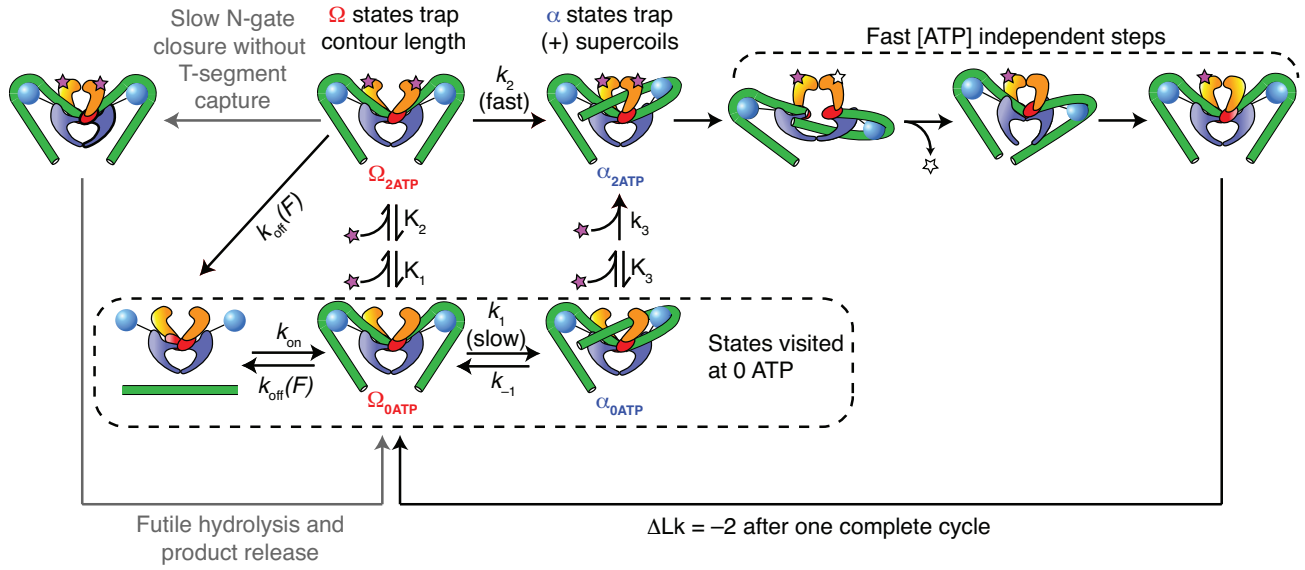

**Supplementary Figure 4** Expanded mechanochemical model. The branched kinetic model (Fig. 7) is expanded here to show potential unproductive cycles (gray) in which the ATP gate closes without capturing a T-segment, and ATP hydrolysis is required to re-open the gate. We hypothesize that these futile cycles are avoided in DNA gyrase because gate closure in  $\Omega_{2ATP}$  is slow in comparison to  $k_2$ . This contrasts with yeast topoisomerase II, which is thought to perform several futile hydrolysis cycles per strand passage<sup>3</sup> at high [ATP]. At very low [ATP], both enzymes avoid futile cycles because T-segment docking precedes ATP binding — in DNA gyrase, this corresponds to the pathway through  $\alpha_{0ATP}$ .

According to our hypothesis, a T-segment is required for rapid nucleotide-driven N-gate closure. In our kinetic model (Figure 7 and above), there are long dwells in  $\Omega$  with ATP bound to both ATPase domains. The N-gate may remain open during these dwells, if there is a kinetic barrier to closure in the absence of a T-segment. A conformational fluctuation from  $\Omega$  to  $\alpha$  can then be efficiently trapped by rapid nucleotide-driven gate closure triggered by the T-segment. A similar mechanism of ATP conservation has been proposed for the bacterial Hsp90 protein HtpG, in which slow ATP-mediated dimerization is accelerated in the presence of substrate<sup>4</sup>.

## SUPPLEMENTARY NOTES

**Kinetic modeling:** Parameters for the branched model (**Fig. 7**) were determined by fitting model predictions to measurements of state lifetimes and transition processivity as a function of [ATP]. The

rate of exit from the  $\Omega$  state  $k_{\Omega} = \langle \tau_0 \rangle^{-1} = \langle \tau_{start} \rangle^{-1}$  was modeled assuming  $K_1 \gg K_2$ , giving

$k_{\Omega} = \frac{k_2[ATP]^2}{[ATP]^2 + K_1K_2} + \frac{k_1K_1K_2}{K_1K_2 + [ATP]^2} + k_{off}$ , and fit to measured  $\langle \tau_0 \rangle$  (**Fig. 6c**). The rate of exit from the

$\alpha$  state  $k_{\alpha} = \langle \tau_1 \rangle^{-1} = \langle \tau_{futile} \rangle^{-1}$  was modeled at low [ATP] assuming  $K_3 \gg [ATP]$ , giving

$k_{\alpha} = k_{-1} + \frac{k_3}{K_3}[ATP]^2$ , and fit to the average over all categories of  $\alpha$  state lifetimes (**Fig. 6c**). The

transition processivity  $P_T = 1 - \frac{k_{off}}{k_{\Omega}}$  (**Fig. 7c**, inset) is related to measurable quantities by

$P_T = 1 - \langle n_{fut} + n_{for} \rangle^{-1}$ , where  $n_{fut}$  and  $n_{for}$  are the number of futile excursions and forward steps

respectively per processive burst, ignoring binding events for which  $n_{fut} + n_{for} = 0$ . Overall velocity and

processivity were predicted from the model with no further fitting. We define the fraction of  $\Omega$  to  $\alpha$

transitions that occur via the ATP-independent branch,

$P_{\alpha_0} = \frac{k_1K_1K_2}{K_1K_2 + [ATP]^2} \left( \frac{k_1K_1K_2}{K_1K_2 + [ATP]^2} + \frac{k_2[ATP]^2}{K_1K_2 + [ATP]^2} \right)^{-1}$ , and also the probability that an  $\alpha_{0ATP}$  state

proceeds to strand transfer rather than futile reversion,  $P_f = \frac{k_3[ATP]^2}{k_{\alpha}K_3}$ . Supercoiling velocity (**Fig. 7b**)

is then given by  $V = \frac{1 - P_{\alpha_0} + P_{\alpha_0}P_f}{k_{\Omega}^{-1} + P_{\alpha_0}k_{\alpha}^{-1}}$ . Processivity (**Fig. 7c**) is given by  $P = \frac{P_T(1 - P_{\alpha_0} + P_{\alpha_0}P_f)}{1 - P_T P_{\alpha_0}(1 - P_f)}$  and can be

related to measurements using  $P = 1 - \frac{1}{\langle n_{for} \rangle}$ , ignoring binding events for which  $n_{for} = 0$  as in earlier

work<sup>5</sup>. Errors in best fit parameters (**Fig. 7a**) were estimated by parametric bootstrap analysis as

described earlier<sup>6</sup> except in the case of  $\sqrt{K_1 K_2}$ , for which the error was taken from the covariance matrix of the least squares fit, which produced a larger error estimate than the bootstrap.

## REFERENCES

1. Baker, N.M., Weigand, S., Maar-Mathias, S. & Mondragon, A. Solution structures of DNA-bound gyrase. *Nucleic Acids Res* (2010).
2. Trigueros, S., Salceda, J., Bermudez, I., Fernandez, X. & Roca, J. Asymmetric removal of supercoils suggests how topoisomerase II simplifies DNA topology. *Journal of molecular biology* **335**, 723-31 (2004).
3. Lindsley, J.E. & Wang, J.C. On the coupling between ATP usage and DNA transport by yeast DNA topoisomerase II. *The Journal of biological chemistry* **268**, 8096-104 (1993).
4. Street, T.O., Lavery, L.A. & Agard, D.A. Substrate binding drives large-scale conformational changes in the Hsp90 molecular chaperone. *Molecular cell* **42**, 96-105 (2011).
5. Gore, J. et al. Mechanochemical analysis of DNA gyrase using rotor bead tracking. *Nature* **439**, 100-4 (2006).
6. Elting, M.W., Bryant, Z., Liao, J.C. & Spudich, J.A. Detailed tuning of structure and intramolecular communication are dispensable for processive motion of myosin VI. *Biophysical journal* **100**, 430-9 (2011).
